# Supplementary material
Source: publisher figshare collection journal article supplement (https://brill.figshare.com/ndownloader/files/20485062)
Supplement: Supplementary file 1 [file 20485062]

**Speed, Accuracy, and Efficiency of Judgements of Coincidence  
between Speech Acts and Auditory Perception during a Delayed  
Auditory Feedback Paradigm: A Behavioral Study in Patients  
with Schizophrenia**

**Daniela Hubl<sup>1,\*</sup>, Nicolas Moor<sup>1</sup>, Jochen Kindler<sup>2</sup>, Mara Kottlow<sup>1</sup>, Thomas Dierks<sup>1</sup> and  
Thomas Koenig<sup>1</sup>**

<sup>1</sup>Translational Research Center, University Hospital of Psychiatry and Psychotherapy, University of Bern,  
Switzerland

<sup>2</sup>University Hospital of Child and Adolescent Psychiatry and Psychotherapy, University of Bern, Switzerland

Received 28 May 2019; accepted 24 October 2019

\* To whom correspondence should be addressed. E-mail: daniela.hubl@upd.unibe.ch

**Supplementary Material**

**Table S1.**

Details on patients' demographics and psychometric measures.

|              | <b>Diagno-<br/>sis [ICD<br/>10]</b> | <b>Age<br/>[y]</b> | <b>Sex</b> | <b>PANSS<br/>pos</b> | <b>PANSS<br/>neg</b> | <b>PANSS<br/>total</b> | <b>HRS<br/>sum</b> | <b>Psy-<br/>RatS<br/>hallu</b> | <b>Psy-<br/>RatS<br/>delusion</b> | <b>PsyRatS<br/>total</b> | <b>Medication</b>       | <b>Medication II</b>     | <b>CPZE [mg]</b> |
|--------------|-------------------------------------|--------------------|------------|----------------------|----------------------|------------------------|--------------------|--------------------------------|-----------------------------------|--------------------------|-------------------------|--------------------------|------------------|
| <b>1-AH</b>  | F20.0                               | 35                 | m          | 14                   | 16                   | 68                     | 22                 | 31                             | 19                                | 50                       | paliperidone            | pregabalin               | 400              |
| <b>2-AH</b>  | F20.0                               | 44                 | m          | 16                   | 16                   | 58                     | 22                 | 15                             | 0                                 | 15                       | clozapine               |                          | 800              |
| <b>3-AH</b>  | F20.0                               | 31                 | f          | 9                    | 13                   | 40                     | 16                 | 12                             | 0                                 | 12                       | clozapine               |                          | 550              |
| <b>4-AH</b>  | F20.3                               | 42                 | f          | 11                   | 11                   | 48                     | 22                 | 16                             | 0                                 | 16                       | clozapine               |                          | 350              |
| <b>5-AH</b>  | F20.0                               | 50                 | f          | 14                   | 19                   | 52                     | 25                 | 30                             | 0                                 | 30                       | clozapine               | lamictal, topi-<br>ramat | 350              |
| <b>6-AH</b>  | F25.0                               | 45                 | m          | 21                   | 11                   | 49                     | 10                 | 19                             | 8                                 | 27                       | haloperidol, quetiapine | topiramate               | 1179             |
| <b>7-AH</b>  | F20.0                               | 51                 | f          | 12                   | 9                    | 47                     | 31                 | 34                             | 0                                 | 34                       | quetiapine              |                          | 200              |
| <b>8-AH</b>  | F20.0                               | 31                 | m          | 12                   | 16                   | 56                     | 22                 | 16                             | 0                                 | 16                       | clozapine, quetiapine   |                          | 733              |
| <b>9-AH</b>  | F25.1                               | 54                 | m          | 23                   | 28                   | 92                     | 38                 | 34                             | 22                                | 56                       | risperidone, quetiapine |                          | 1240             |
| <b>10-AH</b> | F20.0                               | 31                 | f          | 24                   | 35                   | 95                     | 22                 | 16                             | 22                                | 38                       | risperidone             |                          | 150              |
| <b>11-AH</b> | F20.2                               | 61                 | f          | 15                   | 18                   | 56                     | 16                 | 23                             | 10                                | 33                       | risperidone             |                          | 300              |
| <b>1-NH</b>  | F23.1                               | 49                 | f          | 11                   | 12                   | 37                     | 0                  | 0                              | 0                                 | 0                        | clozapine               |                          | 700              |

|             |       |    |   |    |    |    |   |   |    |    |                             |           |      |
|-------------|-------|----|---|----|----|----|---|---|----|----|-----------------------------|-----------|------|
| <b>2-NH</b> | F20.0 | 26 | m | 9  | 31 | 80 | 0 | 0 | 0  | 0  | paliperidone,<br>quetiapine |           | 667  |
| <b>3-NH</b> | F25.0 | 54 | f | 18 | 9  | 50 | 0 | 0 | 12 | 12 | olanzapine                  | valproate | 500  |
| <b>4-NH</b> | F20.0 | 50 | f | 21 | 11 | 39 | 0 | 0 | 11 | 11 | --                          | --        |      |
| <b>5-NH</b> | F25.1 | 56 | f | 13 | 11 | 41 | 0 | 0 | 0  | 0  | clozapine, quetiapine       | lithium   | 633  |
| <b>6-NH</b> | F20.1 | 25 | m | 20 | 29 | 81 | 0 | 0 | 0  | 0  | olanzapine                  |           | 500  |
| <b>7-NH</b> | F20.0 | 46 | m | 15 | 26 | 67 | 0 | 0 | 14 | 14 | paliperidon                 |           | 238  |
| <b>8-NH</b> | F25.0 | 32 | m | 10 | 17 | 48 | 0 | 0 | 12 | 12 | clozapine                   | valproate | 450  |
| <b>9-NH</b> | F20.3 | 34 | m | 17 | 32 | 80 | 0 | 0 | 17 | 17 | clozapine                   | valproate | 1320 |

---

ICD 10 diagnoses: F20.0 = Paranoid schizophrenia; F20.1 = Hebephrenic schizophrenia; F20.2 1 = Catatonic schizophrenia; F20.3 = Undifferentiated schizophrenia; F23 = Acute polymorphic psychotic disorder with symptoms of schizophrenia; F25 = Schizoaffective disorder. PANSS: Positive and Negative Syndrome Scale; PsyRatS: Psychotic Symptoms Rating Scale; HRS: Hallucination Rating Scale; CPZE: Chlorpromazine-equivalents. Patients with (AH) and without (NH) auditory verbal hallucinations. m = male, f = female.

**Figure S1.** Schema of how the corrected reaction time (cRT) was computed.

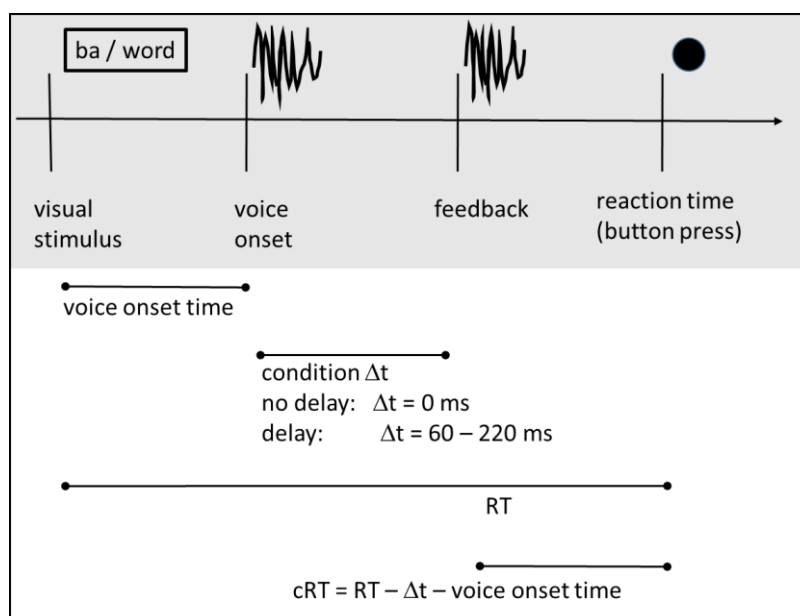

The voice onset time comprises the time between visual presentation of the stimulus on the computer screen and the time of the onset of the first verbalization. It was measured with either type of stimulus and averaged, to subtract the mean voice onset time from the individual reaction time. Due to technical issues, this was only based on the individual mean voice onset time of the delayed conditions. However, at the moment of voice onset, it was impossible for the subjects to know if the following feedback would be delayed or not, so we do not expect any systematic differences in voice onset between the no-delay and delay condition.

$\Delta t$  = delay (both conditions), RT = reaction time, cRT = corrected reaction time.

**Figure S2.** Mean voice onset for all groups. Mean values with standard deviations for either stimulus type are presented. The voice onset is same in both conditions, delay and no delay, and thus taken together.

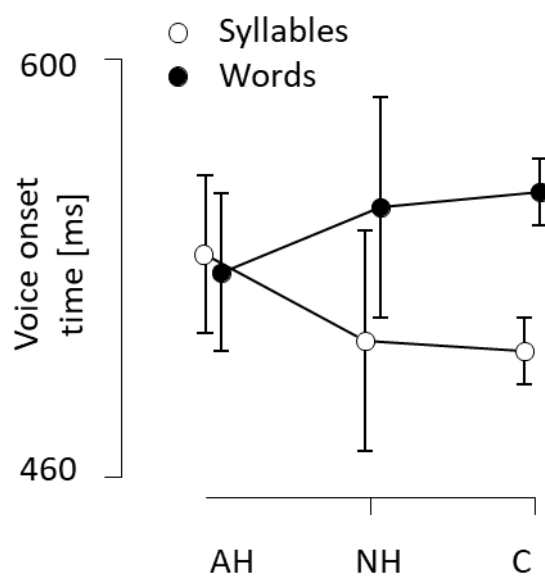

C = healthy controls, AH = patients with auditory verbal hallucinations, NH = patients without auditory verbal hallucinations.
